# Supplementary material
Source: Springer Nature journal article supplement (https://www.springermedizin.de/resource/supplementary/12879_2011_1680_MOESM4_ESM.pdf/9443076)

(A) All-cause

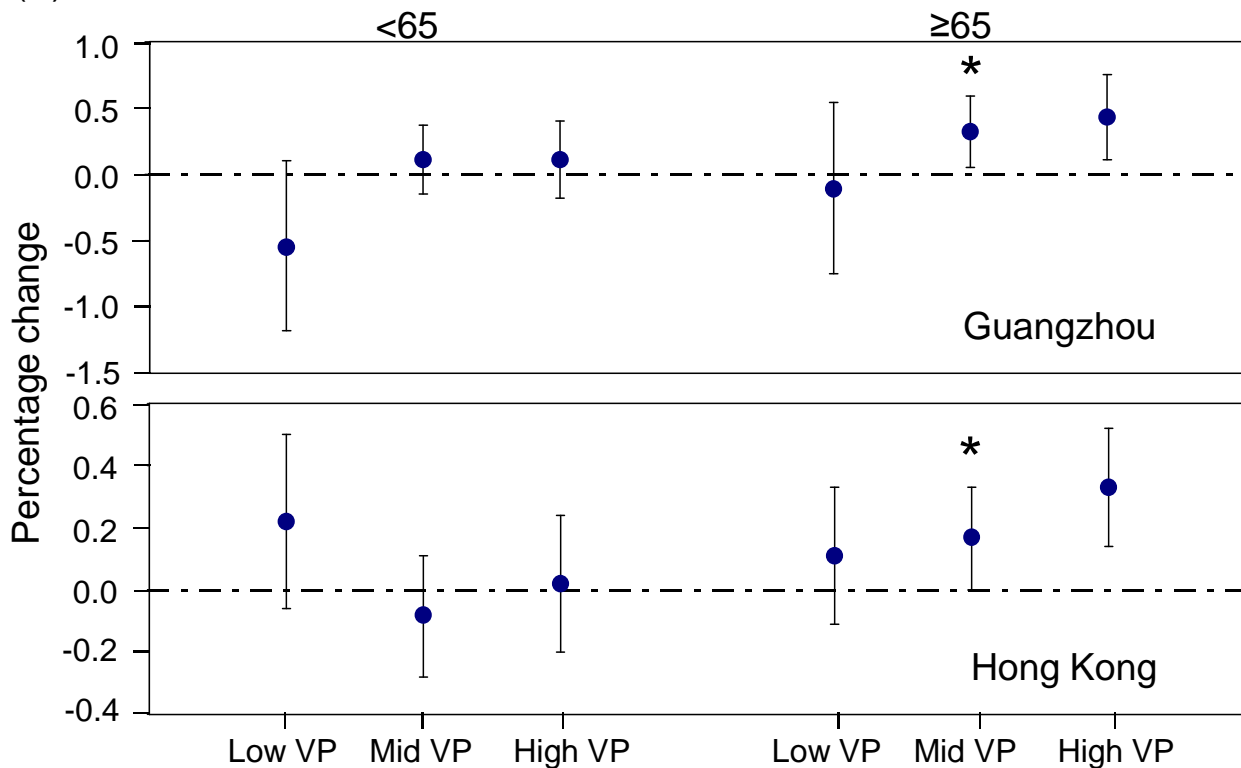

(B) CRD

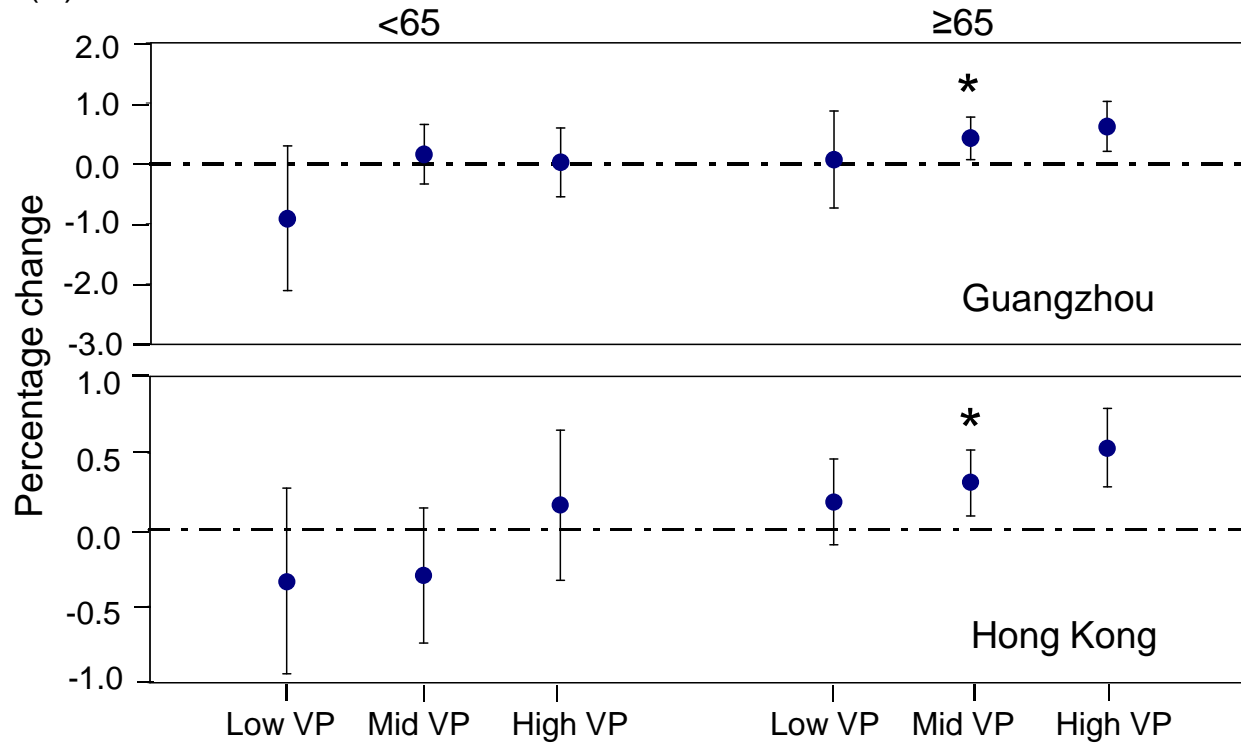

Supplement: MOESM4 [file 9443076]
